# Supplementary material for: Restructuring physical micro-environments to reduce the demand for meat: a systematic review and qualitative comparative analysis
Source: PubMed Central journal article supplement (PMC6120131; doi:10.1016/s2542-5196(18)30188-8), 2018-09
Supplement: mmc1.pdf [file mmc1.pdf]

# THE LANCET

## Planetary Health

### Supplementary appendix

This appendix formed part of the original submission and has been peer reviewed. We post it as supplied by the authors.

Supplement to: Bianchi F, Garnett E, Dorsel C, Aveyard P, Jebb SA. Restructuring physical micro-environments to reduce the demand for meat: a systematic review and qualitative comparative analysis. *Lancet Planet Health* 2018; **2**: e384–97.

# Restructuring physical micro-environments to reduce the demand for meat: a systematic review and qualitative comparative analysis

*Filippo Bianchi, Emma Garnett, Claudia Dorsel, Paul Aveyard, Susan A Jebb*

## Appendix (1-4)

|                     | Inclusion criteria                                                                                                                                                                                                                                                           | Exclusion criteria                                                                                                                                                                               |
|---------------------|------------------------------------------------------------------------------------------------------------------------------------------------------------------------------------------------------------------------------------------------------------------------------|--------------------------------------------------------------------------------------------------------------------------------------------------------------------------------------------------|
| <b>Population</b>   | All were eligible.                                                                                                                                                                                                                                                           | People diagnosed with clinical conditions for which it is required to consume specific amounts of meat.                                                                                          |
| <b>Intervention</b> | Interventions restructuring one or more elements of physical micro-environments (e.g. availability, portion size, position, label, sensory properties, or price) to reduce the demand for meat with or without additional educational, motivational, or training components. | Interventions promoting general dietary patterns (e.g. Mediterranean diet) and interventions not featuring any component of environmental restructuring (e.g. purely educational interventions). |
| <b>Comparator</b>   | In order of preference (1) no- or minimal-intervention controls, (2) pre-intervention baselines, or (3) other eligible interventions.                                                                                                                                        | N/A                                                                                                                                                                                              |
| <b>Outcome</b>      | Objective or self-reported measures of meat demand, defined as the actual or intended consumption, purchase, or selection of meat in real or virtual environments.                                                                                                           | N/A                                                                                                                                                                                              |
| <b>Study Design</b> | Any experimental intervention study, including pilot and feasibility studies regardless of publication status, publication year, language, or length of follow-up.                                                                                                           | Qualitative and non-experimental studies.                                                                                                                                                        |

### Appendix 1: Eligibility Criteria

| Block                      | Keywords (MEDLINE)                                                                                                                                                                                                                                                                                                                                                                                                                                                                                                                                                                                                                                                                                                                                                                                                                                                                                                                                                                                                                                                  | Hits (MEDLINE) |
|----------------------------|---------------------------------------------------------------------------------------------------------------------------------------------------------------------------------------------------------------------------------------------------------------------------------------------------------------------------------------------------------------------------------------------------------------------------------------------------------------------------------------------------------------------------------------------------------------------------------------------------------------------------------------------------------------------------------------------------------------------------------------------------------------------------------------------------------------------------------------------------------------------------------------------------------------------------------------------------------------------------------------------------------------------------------------------------------------------|----------------|
| 1                          | ((meat* or beef or veal or lamb or pork or poultry or chicken or turkey or venison or offal* or sausage* or ham or pastrami or bacon or salami or nugget* or burger* or hamburger* or black pudding* or haggis or plant-based or vegetable-based or vegetar* or vegan* or flexitarian* or ((green or environment* or sustainab*) adj2 (eat or eating or diet*))) adj7 (chang* or increas* or decreas* or improv* or reduc* or low or moderat* or shift* or eliminat* or replac* or substitut* or alternat* or cut* or more or less or free or sustainab* or promot* or encourag* or enhance* or support* or motivat* or achiev*) adj7 (consum* or intak* or eat* or purchas* or choos* or select* or prefer* or demand* or buy* or avoid* or choice* or nudg* or cook* or prepar* or cater* or behav* or inten* or attitud* or social* norm*)),ti,ab.                                                                                                                                                                                                               | 6781           |
| 2                          | ((meat* or beef or veal or lamb or pork or poultry or chicken or turkey or venison or offal* or sausage* or ham or pastrami or bacon or salami or nugget* or burger* or hamburger* or black pudding* or haggis or plant-based or vegetable-based or vegetar* or vegan* or flexitarian* or ((green or environment* or sustainab*) adj2 (eat or eating or diet*))) adj7 (consum* or intak* or eat* or purchas* or choos* or select* or prefer* or demand* or buy* or avoid* or choice* or nudg* or cook* or prepar* or cater* or behav* or inten* or attitud* or social* norm*) adj7 (chang* or increas* or decreas* or improv* or reduc* or low or moderat* or shift* or eliminat* or replac* or substitut* or alternat* or cut* or more or less or free or sustainab* or promot* or encourag* or enhance* or support* or motivat* or achiev*)),ti,ab.                                                                                                                                                                                                               | 7008           |
| 3                          | ((chang* or increas* or decreas* or improv* or reduc* or low or moderat* or shift* or eliminat* or replac* or substitut* or alternat* or cut* or more or less or free or sustainab* or promot* or encourag* or enhance* or support* or motivat* or achiev*) adj7 (consum* or intak* or eat* or purchas* or choos* or select* or prefer* or demand* or buy* or avoid* or choice* or nudg* or cook* or prepar* or cater* or behav* or inten* or attitud* or social* norm*)) adj7 (meat* or beef or veal or lamb or pork or poultry or chicken or turkey or venison or offal* or sausage* or ham or pastrami or bacon or salami or nugget* or burger* or hamburger* or black pudding* or haggis or plant-based or vegetable-based or vegetar* or vegan* or flexitarian* or ((green or environment* or sustainab*) adj2 (eat or eating or diet*))) adj7 (consum* or intak* or eat* or purchas* or choos* or select* or prefer* or demand* or buy* or avoid* or choice* or nudg* or cook* or prepar* or cater* or behav* or inten* or attitud* or social* norm*)),ti,ab. | 6734           |
| 4                          | 1 or 2 or 3                                                                                                                                                                                                                                                                                                                                                                                                                                                                                                                                                                                                                                                                                                                                                                                                                                                                                                                                                                                                                                                         | 7722           |
| 5                          | ((randomized controlled trial or controlled clinical trial).pt. or randomized.ab. or placebo.ab. or drug therapy.fs. or randomly.ab. or trial.ab. or groups.ab.) not (exp animals/ not humans.sh.)                                                                                                                                                                                                                                                                                                                                                                                                                                                                                                                                                                                                                                                                                                                                                                                                                                                                  | 3647928        |
| 6                          | ((feasability or pilot or demonstration or multicentre* or multicentre* or multi-centre* or multi-center* or preliminary or follow-up or major) adj2 (stud* or project?)) or intervention or preintervention or postintervention or pre-post or (pre adj5 post) or quasiexperiment* or quasi-experiment* or quasirandom* or quasi-random or (before adj10 (after or during)) or ("time series" adj2 interrupt*) or ("time points" adj3 (over or multiple or day? or week? or month?)),mp. not (exp animals/ not humans.sh.)                                                                                                                                                                                                                                                                                                                                                                                                                                                                                                                                         | 1591076        |
| 7                          | 5 or 6                                                                                                                                                                                                                                                                                                                                                                                                                                                                                                                                                                                                                                                                                                                                                                                                                                                                                                                                                                                                                                                              | 4672088        |
| 8                          | 4 and 7                                                                                                                                                                                                                                                                                                                                                                                                                                                                                                                                                                                                                                                                                                                                                                                                                                                                                                                                                                                                                                                             | 1845           |
| <b>Databases searched:</b> | CAB Abstracts [OvidSP](1973 to 2017 week 33), Embase [OvidSP](1974 to Aug 31, 2017), PsycINFO [OvidSP](1967 to August week 3 2017), Science Citation Index [Web of Science Core Collection](1945 to Aug 31, 2017), MEDLINE [OvidSP](1946 to Aug 31, 2017), and Dissertations & Theses:Global full-text [Proquest] (Aug 31, 2017)                                                                                                                                                                                                                                                                                                                                                                                                                                                                                                                                                                                                                                                                                                                                    |                |

## Appendix 2: Databases search strategy

| Paper                                                               | Sample characteristics and study comparison                                                                      | Intervention                                                                                                                                                                         | Outcome                                                                                                                                                                                                 | Results                                                                                                                                              |
|---------------------------------------------------------------------|------------------------------------------------------------------------------------------------------------------|--------------------------------------------------------------------------------------------------------------------------------------------------------------------------------------|---------------------------------------------------------------------------------------------------------------------------------------------------------------------------------------------------------|------------------------------------------------------------------------------------------------------------------------------------------------------|
| <b>Manipulation of the sensory properties of meat</b>               |                                                                                                                  |                                                                                                                                                                                      |                                                                                                                                                                                                         |                                                                                                                                                      |
| Kunst and Hohle (2016), study 2b <sup>1</sup>                       | Sample size: N=101<br>Age: M=35, SD=11<br>Female: 60%<br>Comparison: IG vs CG, RCT                               | IG: Participants viewed a picture of a pork roast with the pig's head.<br>CG: Participants viewed a picture of a pork roast without the pig's head.                                  | Attitudes towards eating the pork roast were assessed by asking participants how negative or positive they felt about eating it on a scale from 0 (extremely negative) to 100 (extremely positive).     | Attitudes towards eating the pork roast were significantly less positive in the IG (M≈45, SE≈5) than in the CG (M≈64, SE≈5, t(99)=-2.77, p=0.007).   |
| Kunst and Palacios Haugestad (2018), American sample <sup>2</sup>   | Sample size: N=178<br>Age: M=36, SD=11 <sup>(a)</sup><br>Female: 42% <sup>(a)</sup><br>Comparison: IG vs CG, RCT | IG: Participants viewed a picture of a pork roast with the pig's head.<br>CG: Participants viewed a picture of a pork roast without the pig's head.                                  | Attitudes towards eating the pork roast were assessed by asking participants how negative or positive they felt about eating it on a scale from 0 (extremely negative) to 100 (extremely positive).     | Attitudes towards eating the pork roast were significantly less positive in the IG (M≈38, SE≈3) than in the CG (M≈66, SE≈3, t(176)=-6, p<0.001).     |
| Kunst and Palacios Haugestad (2018), Ecuadorian sample <sup>2</sup> | Sample size: N=183<br>Age: M=27, SD=9 <sup>(b)</sup><br>Female: 58% (b)<br>Comparison: IG vs CG, RCT             | IG: Participants viewed a picture of a pork roast with the pig's head.<br>CG: Participants viewed a picture of a pork roast without the pig's head.                                  | Attitudes towards eating the pork roast were assessed by asking participants how negative or positive they felt about eating it on a scale from 0 (extremely negative) to 100 (extremely positive).     | Attitudes towards eating the pork roast did not differ between the IG (M≈59, SE≈2) and the CG (M≈62, SE≈2, t(181)=-0.89, p=0.377).                   |
| <b>Manipulating the description of meat</b>                         |                                                                                                                  |                                                                                                                                                                                      |                                                                                                                                                                                                         |                                                                                                                                                      |
| Kunst and Hohle (2016), study 5 <sup>1</sup>                        | Sample size: N=190<br>Age: M=34, SD=10<br>Female: 52%<br>Comparison: IG vs CG, RCT                               | IG: Food menu with 8 meat-based meals, which were described as 'cow' and 'pig' options.<br>CG: Food menu with 8 meat-based meals, which were described as 'beef' and 'pork' options. | Attitudes towards eating the meat options were assessed by asking participants how negative or positive they felt about eating them on a scale from 0 (extremely negative) to 100 (extremely positive). | Attitudes towards eating the meat options were significantly less positive in the IG (M≈51, SE≈4) than in the CG (M≈69, SE≈4) t(188)=3.59, p<0.001). |

M=Mean, SD=Standard deviation, SE=Standard error, IG=Intervention group, CG= Control group, ≈ indicates results were read from figures or graphs. (a) Of the 201 participants enrolled. (b) Of the 202 participants enrolled.

### Appendix 3: Interventions and their impact on or association with attitudes, perceived behavioural control, and subjective social norms of eating, purchasing, or selecting (less) meat.

| Paper                                                                                                                                                                                                                                                                                                                    | Sample characteristics and study comparison                                                              | Outcome                                                                                                                                                                                                                                                                                                                                                               | Results                                                                                                                                                                                                                                                                                                                                                                                                                     |
|--------------------------------------------------------------------------------------------------------------------------------------------------------------------------------------------------------------------------------------------------------------------------------------------------------------------------|----------------------------------------------------------------------------------------------------------|-----------------------------------------------------------------------------------------------------------------------------------------------------------------------------------------------------------------------------------------------------------------------------------------------------------------------------------------------------------------------|-----------------------------------------------------------------------------------------------------------------------------------------------------------------------------------------------------------------------------------------------------------------------------------------------------------------------------------------------------------------------------------------------------------------------------|
| <b>Weight</b>                                                                                                                                                                                                                                                                                                            |                                                                                                          |                                                                                                                                                                                                                                                                                                                                                                       |                                                                                                                                                                                                                                                                                                                                                                                                                             |
| Clark (2017) <sup>3</sup>                                                                                                                                                                                                                                                                                                | Sample size: N=37<br>Age: Median 27 (25th-95th percentile: 24-32)<br>Female: 57%<br>Comparison: Pre-post | Weight was measured using a calibrated scale before the intervention commenced and at the end of the 12 weeks intervention.                                                                                                                                                                                                                                           | Weight did not differ significantly between the control and the intervention period ( $p=0.23$ ).                                                                                                                                                                                                                                                                                                                           |
| Flynn et al (2013) <sup>4</sup>                                                                                                                                                                                                                                                                                          | Sample size: N=63<br>Age: M=52, SD=17<br>Female: 84%<br>Comparison: Pre-post                             | The Body Mass Index (BMI) was calculated at the baseline and 6 months post intervention using (1) non-fasted and clothed weight measured with an electronic scale with 50g gradation, whose accuracy was previously determined using standardized weights and (2) height (without shoes) measured with a tape.                                                        | BMI was marginally significantly lower 6 months post-intervention completion (M=32.9, SD=8.4) than at the baseline (M=33.3, SD= 8.5, $p=0.05$ )                                                                                                                                                                                                                                                                             |
| Holloway et al (2012) <sup>5</sup>                                                                                                                                                                                                                                                                                       | Sample size: N=25<br>Age: M=21, SD=3<br>Female: 60%<br>Comparison: Pre-post                              | Weight with light clothing was measured to the nearest 0.01 kg using a digital scale at the baseline and at the end of the 4 weeks intervention                                                                                                                                                                                                                       | The weight among males was M=74.1 ( $\pm$ 12.8) at baseline and 73.4 ( $\pm$ 10.9) at the intervention completion. The weight among females was M=59 ( $\pm$ 8.1) at baseline and M=59.2 ( $\pm$ 7.8) at the intervention completion. The author reports “no significant effects on body weight”.                                                                                                                           |
| <b>Blood lipids</b>                                                                                                                                                                                                                                                                                                      |                                                                                                          |                                                                                                                                                                                                                                                                                                                                                                       |                                                                                                                                                                                                                                                                                                                                                                                                                             |
| Clark (2017) <sup>3</sup>                                                                                                                                                                                                                                                                                                | Sample size: N=37<br>Age: Median 27 (25th-95th percentile: 24-32)<br>Female: 57%<br>Comparison: Pre-post | Total cholesterol, total TAG, LDL-cholesterol and HDL-cholesterol were assessed using a Pentra 400 clinical chemistry analyser on a 16 ml blood sample taken via venepuncture. Blood lipids were assessed before the intervention commenced and at the end of the 12 weeks intervention.                                                                              | Total cholesterol (M=-6.8%, $p=0.082$ ), HDL cholesterol ( $p=0.807$ ), and total TAG ( $p=0.864$ ) did not decrease significantly over the intervention period, while LDL cholesterol did (M=-9.7%, $p=0.012$ ).                                                                                                                                                                                                           |
| Holloway et al (2012) <sup>5</sup>                                                                                                                                                                                                                                                                                       | Sample size: N=25<br>Age: M=21, SD=3<br>Female: 60%<br>Comparison: Pre-post                              | Total cholesterol, HDL-cholesterol, and total TAG were measured using enzymatic colorimetric techniques with a Horiba Analyser. LDL-cholesterol was calculated using the Friedewald Equation. Analyses were performed on an 8-millilitre 12-hour overnight fasting blood sample collected by venepuncture at the baseline and at the end of the 4 weeks intervention. | Total cholesterol (baseline: 4.45 $\pm$ 0.53, follow-up: 4.05 $\pm$ 0.66 $p<0.001$ ), LDL cholesterol (baseline: 2.40 $\pm$ 0.36, follow-up: 2.15 $\pm$ 0.46, $p=0.007$ ), and total TAG (baseline: 1.14 $\pm$ 0.53, follow-up: 0.88 $\pm$ 0.31, $p=0.016$ ) were significantly lower at post intervention, while HDL cholesterol was not (baseline: 1.53 $\pm$ 0.39, follow-up: 1.5 $\pm$ 0.38, $p=0.47$ ). <sup>(a)</sup> |
| <b>Blood pressure</b>                                                                                                                                                                                                                                                                                                    |                                                                                                          |                                                                                                                                                                                                                                                                                                                                                                       |                                                                                                                                                                                                                                                                                                                                                                                                                             |
| Clark (2017) <sup>3</sup>                                                                                                                                                                                                                                                                                                | Sample size: N=37<br>Age: Median 27 (25th-95th percentile: 24-32)<br>Female: 57%<br>Comparison: Pre-post | Systolic blood pressure (SBP) and diastolic blood pressure (DSB) were assessed at the baseline and at the end of the 12 weeks intervention.                                                                                                                                                                                                                           | Neither SBP ( $p=0.2$ ) nor DBP ( $p=0.32$ ) changed over the intervention period.                                                                                                                                                                                                                                                                                                                                          |
| M=Mean, SD=Standard deviation, IG=Intervention group, CI=Confidence interval, OR=Odds ratio, HDL=High-density lipoprotein, LDL=Low-density lipoprotein, TAG=Triacylglyceride, SBP=systolic blood pressure, DBP=diastolic blood pressure. (a) Results were reported for thoroughness, however these data were based on an |                                                                                                          |                                                                                                                                                                                                                                                                                                                                                                       |                                                                                                                                                                                                                                                                                                                                                                                                                             |

---

independent sample t-test, while a dependent sample t-test is more appropriate for pre-post designs.

---

**Appendix 4: Interventions and their impact on or association with selected biomarkers of health risk.**

---

**References**

- 1 Kunst JR, Hohle SM. Meat eaters by dissociation: how we present, prepare and talk about meat increases willingness to eat meat by reducing empathy and disgust. *Appetite* 2016; **105**: 758–74.
- 2 Kunst JR, Palacios Haugestad CA. The effects of dissociation on willingness to eat meat are moderated by exposure to unprocessed meat: a cross-cultural demonstration. *Appetite* 2018; **120**: 356–66.
- 3 Clark M. Chronic effects of replacing red and processed meat with non/reduced meat alternatives. Unpublished.
- 4 Flynn MM, Reinert S, Schiff AR. A six-week cooking program of plant-based recipes improves food security, body weight, and food purchases for food pantry clients. *J Hunger Environ Nutr* 2013;**8**: 73–84.
- 5 Holloway T, Salter AM, McCullough FS. Dietary intervention to  $\geq 59$  reduce meat intake by 50% in University students—a pilot study. *Proc Nutr Soc* 2012; **71**: E164.
